# Supplementary material for: Temperature and solvent structure dependence of VO2+ complexes of pyridine-N-oxide derivatives and their interaction with human serum transferrin
Source: Royal Society of Chemistry journal article supplement (doi:10.1039/c2dt12503j), 2012-01-01
Supplement: c2dt12503j.pdf [file c2dt12503j.pdf]

## ELECTRONIC SUPPLEMENTARY INFORMATION (ESI)

### Temperature and solvent structure dependence of VO<sup>2+</sup> complexes of pyridine-*N*-oxide derivatives and their interaction with human serum transferrin

Daniele Sanna,<sup>a</sup> Valeria Ugone,<sup>b</sup> Giovanni Micera<sup>b</sup> and Eugenio Garribba\*<sup>b</sup>

<sup>a</sup> *Istituto CNR di Chimica Biomolecolare, Trav. La Crucca 3, I-07040 Sassari, Italy*

<sup>b</sup> *Dipartimento di Chimica e Farmacia, and Centro Interdisciplinare per lo Sviluppo della Ricerca Biotecnologica e per lo Studio della Biodiversità della Sardegna, Università di Sassari, Via Vienna 2, I-07100 Sassari, Italy. Fax: +39 079 229559; Tel: +39 079 229487; E-mail: garribba@uniss.it*

**Table S1** EPR parameters of VO<sup>2+</sup> species formed by Hmpo, calculated at the level of theory BHandHLYP/6-311g(d,p) with Gaussian and PBE0/VTZ with ORCA.<sup>a</sup>

| Complex                                                            | Software | $A_{\text{iso}}^{\text{calcd}}$ | $A_{\text{iso}}^{\text{exptl}}$ | $A_x^{\text{calcd}}$ | $A_y^{\text{calcd}}$ | $A_z^{\text{calcd}}$ | $A_z^{\text{exptl}}$ | % $ A_z $ <sup>b</sup> |
|--------------------------------------------------------------------|----------|---------------------------------|---------------------------------|----------------------|----------------------|----------------------|----------------------|------------------------|
| [VO(mpo) <sub>2</sub> ] <sup>c</sup>                               | Gaussian | -84.5                           | -79.6 <sup>d</sup>              | -55.2                | -48.0                | -150.5               | -144.3 <sup>d</sup>  | 4.3                    |
| [VO(mpo) <sub>2</sub> ] <sup>e</sup>                               | Gaussian | -85.8                           | -79.6 <sup>d</sup>              | -55.9                | -49.7                | -151.8               | -144.3 <sup>d</sup>  | 5.2                    |
| <i>cis</i> -[VO(mpo) <sub>2</sub> (H <sub>2</sub> O)] <sup>f</sup> | Gaussian | -92.4                           | <i>g</i>                        | -60.7                | -57.7                | -158.7               | -154.3               | 2.9                    |
| <i>cis</i> -[VO(mpo) <sub>2</sub> (H <sub>2</sub> O)] <sup>h</sup> | Gaussian | -90.8                           | <i>g</i>                        | -60.1                | -55.1                | -157.1               | -154.3               | 1.8                    |
| <i>cis</i> -[VO(mpo) <sub>2</sub> (H <sub>2</sub> O)] <sup>i</sup> | Gaussian | -95.8                           | <i>g</i>                        | -65.2                | -59.6                | -162.4               | -154.3               | 5.3                    |
| <i>cis</i> -[VO(mpo) <sub>2</sub> (H <sub>2</sub> O)] <sup>l</sup> | Gaussian | -94.4                           | <i>g</i>                        | -63.7                | -58.2                | -161.4               | -154.3               | 4.6                    |
| <i>cis</i> -[VO(mpo) <sub>2</sub> (1-MeIm)] <sup>m</sup>           | Gaussian | -85.5                           | –                               | -53.7                | -51.5                | -151.3               | -149.7               | 1.1                    |
| <i>cis</i> -[VO(mpo) <sub>2</sub> (1-MeIm)] <sup>n</sup>           | Gaussian | -84.1                           | –                               | -53.2                | -49.3                | -149.8               | -149.7               | 0.0                    |
| <i>cis</i> -[VO(mpo) <sub>2</sub> (1-MeIm)] <sup>o</sup>           | Gaussian | -89.8                           | –                               | -58.6                | -54.7                | -156.2               | -149.7               | 4.3                    |
| <i>cis</i> -[VO(mpo) <sub>2</sub> (1-MeIm)] <sup>p</sup>           | Gaussian | -88.6                           | –                               | -56.6                | -53.9                | -155.4               | -149.7               | 3.8                    |
| [VO(mpo) <sub>2</sub> ] <sup>c</sup>                               | ORCA     | -76.3                           | -79.6 <sup>d</sup>              | -39.7                | -47.9                | -141.4               | -144.3 <sup>d</sup>  | -2.0                   |
| [VO(mpo) <sub>2</sub> ] <sup>e</sup>                               | ORCA     | -77.8                           | -79.6 <sup>d</sup>              | -41.4                | -49.2                | -142.9               | -144.3 <sup>d</sup>  | -0.9                   |
| <i>cis</i> -[VO(mpo) <sub>2</sub> (H <sub>2</sub> O)] <sup>f</sup> | ORCA     | -88.8                           | <i>g</i>                        | -53.6                | -57.6                | -155.1               | -154.3               | 0.5                    |
| <i>cis</i> -[VO(mpo) <sub>2</sub> (H <sub>2</sub> O)] <sup>h</sup> | ORCA     | -87.3                           | <i>g</i>                        | -51.6                | -56.6                | -153.7               | -154.3               | -0.4                   |
| <i>cis</i> -[VO(mpo) <sub>2</sub> (H <sub>2</sub> O)] <sup>i</sup> | ORCA     | -91.7                           | <i>g</i>                        | -54.7                | -61.8                | -158.7               | -154.3               | 2.9                    |
| <i>cis</i> -[VO(mpo) <sub>2</sub> (H <sub>2</sub> O)] <sup>l</sup> | ORCA     | -91.5                           | <i>g</i>                        | -54.5                | -61.2                | -158.8               | -154.3               | 2.9                    |
| <i>cis</i> -[VO(mpo) <sub>2</sub> (1-MeIm)] <sup>m</sup>           | ORCA     | -81.9                           | –                               | -48.0                | -50.8                | -146.8               | -149.7               | -1.9                   |
| <i>cis</i> -[VO(mpo) <sub>2</sub> (1-MeIm)] <sup>n</sup>           | ORCA     | -80.5                           | –                               | -46.3                | -50.0                | -145.3               | -149.7               | -2.9                   |

|                                                          |      |       |   |       |       |        |        |     |
|----------------------------------------------------------|------|-------|---|-------|-------|--------|--------|-----|
| <i>cis</i> -[VO(mpo) <sub>2</sub> (1-MeIm)] <sup>o</sup> | ORCA | -86.5 | – | -51.4 | -55.7 | -152.4 | -149.7 | 1.8 |
| <i>cis</i> -[VO(mpo) <sub>2</sub> (1-MeIm)] <sup>p</sup> | ORCA | -85.7 | – | -51.1 | -54.2 | -151.8 | -149.7 | 1.4 |

<sup>a</sup> All the values are in 10<sup>-4</sup> cm<sup>-1</sup>. <sup>b</sup> Percentage deviation respect to the absolute experimental value calculated as: (|A<sub>z</sub>|<sup>calcd</sup> – |A<sub>z</sub>|<sup>exptl</sup>)/|A<sub>z</sub>|<sup>exptl</sup>.

<sup>c</sup> SPY-5-21 structure. <sup>d</sup> Measured in CHCl<sub>3</sub>/toluene 60/40 v/v. <sup>e</sup> SPY-5-23 structure. <sup>f</sup> Coordination mode (S<sup>-</sup>, O<sub>N-ox</sub>); (S<sup>-</sup>, O<sub>N-ox</sub><sup>ax</sup>); H<sub>2</sub>O, with H<sub>2</sub>O in *trans* to S<sup>-</sup>. <sup>g</sup> *cis*-octahedral species with an equatorial water is not formed at room temperature; A<sub>iso</sub><sup>calcd</sup> can be compared with that of *cis*-[VO(mpo)<sub>2</sub>(DMSO)] of 87.1x10<sup>-4</sup> cm<sup>-1</sup>. <sup>h</sup> Coordination mode (S<sup>-</sup>, O<sub>N-ox</sub>); (S<sup>-</sup>, O<sub>N-ox</sub><sup>ax</sup>); H<sub>2</sub>O, with H<sub>2</sub>O in *trans* to O<sub>N-ox</sub>. <sup>i</sup> Coordination mode (S<sup>-</sup>, O<sub>N-ox</sub>); (S<sup>-ax</sup>, O<sub>N-ox</sub>); H<sub>2</sub>O, with H<sub>2</sub>O in *trans* to S<sup>-</sup>. <sup>l</sup> Coordination mode (S<sup>-</sup>, O<sub>N-ox</sub>); (S<sup>-ax</sup>, O<sub>N-ox</sub>); H<sub>2</sub>O, with H<sub>2</sub>O in *trans* to O<sub>N-ox</sub>. <sup>m</sup> Coordination mode (S<sup>-</sup>, O<sub>N-ox</sub>); (S<sup>-</sup>, O<sub>N-ox</sub><sup>ax</sup>); N<sub>imid</sub>, with N<sub>imid</sub> in *trans* to S<sup>-</sup>. <sup>n</sup> Coordination mode (S<sup>-</sup>, O<sub>N-ox</sub>); (S<sup>-</sup>, O<sub>N-ox</sub><sup>ax</sup>); N<sub>imid</sub>, with N<sub>imid</sub> in *trans* to O<sub>N-ox</sub>. <sup>o</sup> Coordination mode (S<sup>-</sup>, O<sub>N-ox</sub>); (S<sup>-ax</sup>, O<sub>N-ox</sub>); N<sub>imid</sub>, with N<sub>imid</sub> in *trans* to S<sup>-</sup>. <sup>p</sup> Coordination mode (S<sup>-</sup>, O<sub>N-ox</sub>); (S<sup>-ax</sup>, O<sub>N-ox</sub>); N<sub>imid</sub>, with N<sub>imid</sub> in *trans* to O<sub>N-ox</sub>.

---

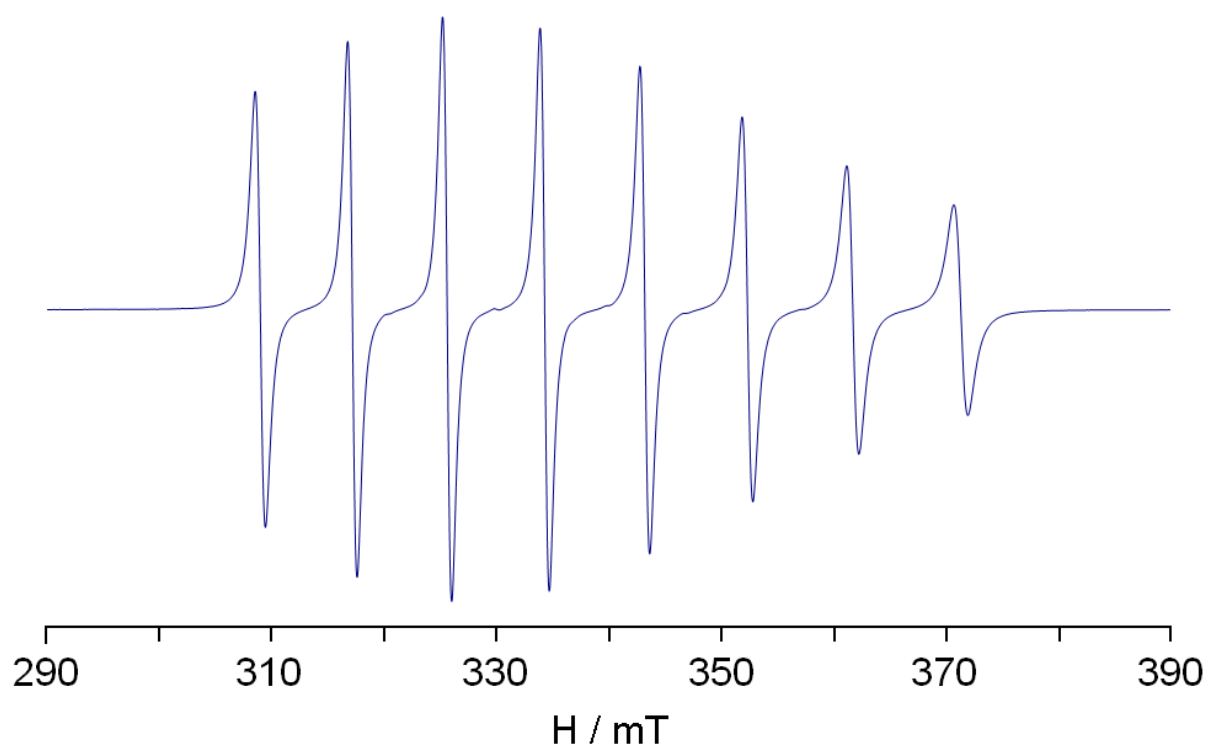

**Fig. S1** X- and isotropic EPR spectrum recorded at RT on a solution obtained dissolving  $[\text{VO}(\text{hpo})_2]$  in  $\text{CH}_2\text{Cl}_2$ . The spectrum belongs to  $[\text{VO}(\text{hpo})_2]$ .

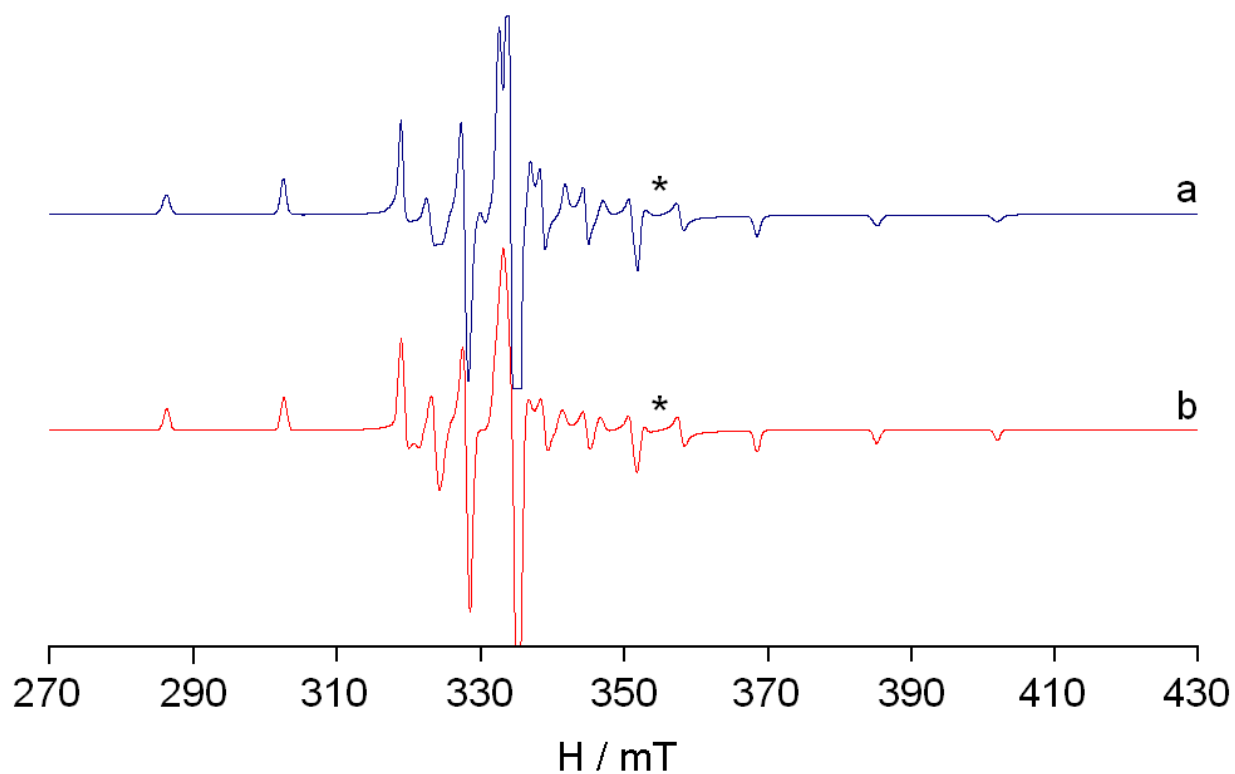

**Fig. S2** X-band anisotropic EPR spectrum recorded at 120 K obtained dissolving [VO(hpo)<sub>2</sub>] in CH<sub>2</sub>Cl<sub>2</sub>: (a) experimental spectrum and (b) simulated spectrum. The spectrum belongs to square pyramidal specie and was simulated with  $g_x = 1.991$ ,  $g_y = 1.981$ ,  $g_z = 1.953$ ,  $A_x = -41.0 \times 10^{-4} \text{ cm}^{-1}$ ,  $A_y = -51.0 \times 10^{-4} \text{ cm}^{-1}$ ,  $A_z = -150.6 \times 10^{-4} \text{ cm}^{-1}$ . The marked  $x,y$  anisotropy is observable in the region denoted by the asterisk.

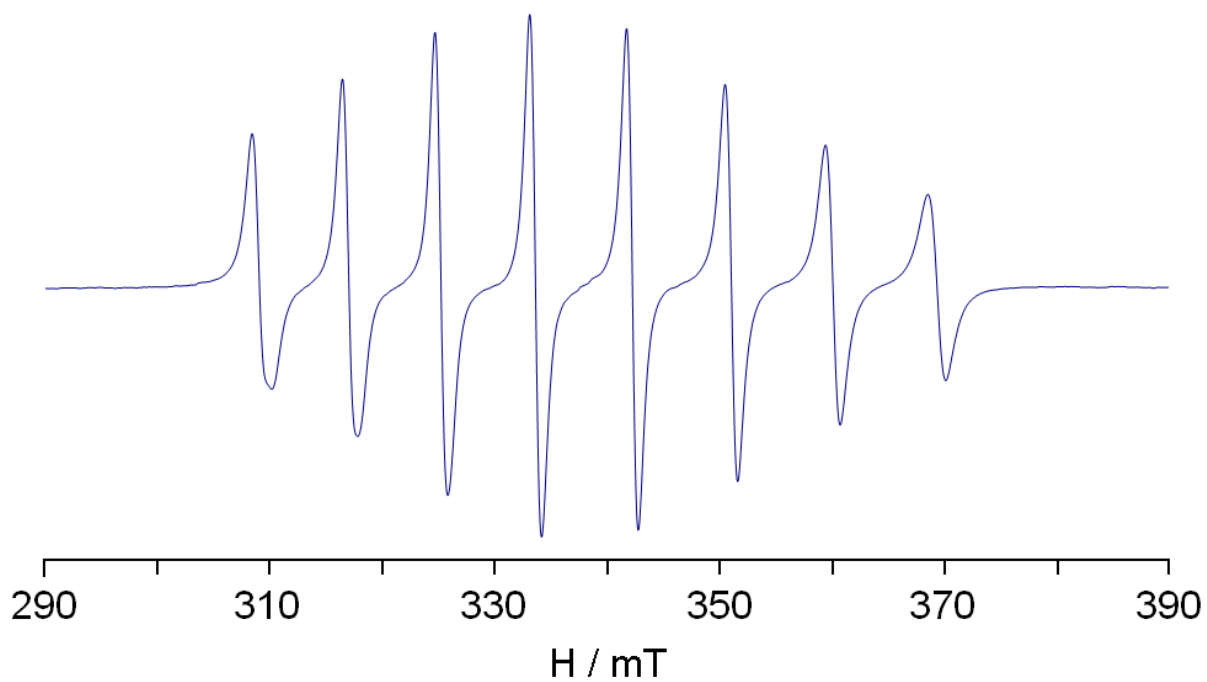

**Fig. S3** X-band isotropic EPR spectrum recorded at RT on a solution obtained dissolving [VO(mpo)<sub>2</sub>] in a mixture CHCl<sub>3</sub>/toluene 60:40 v/v. The spectrum belongs to [VO(mpo)<sub>2</sub>].

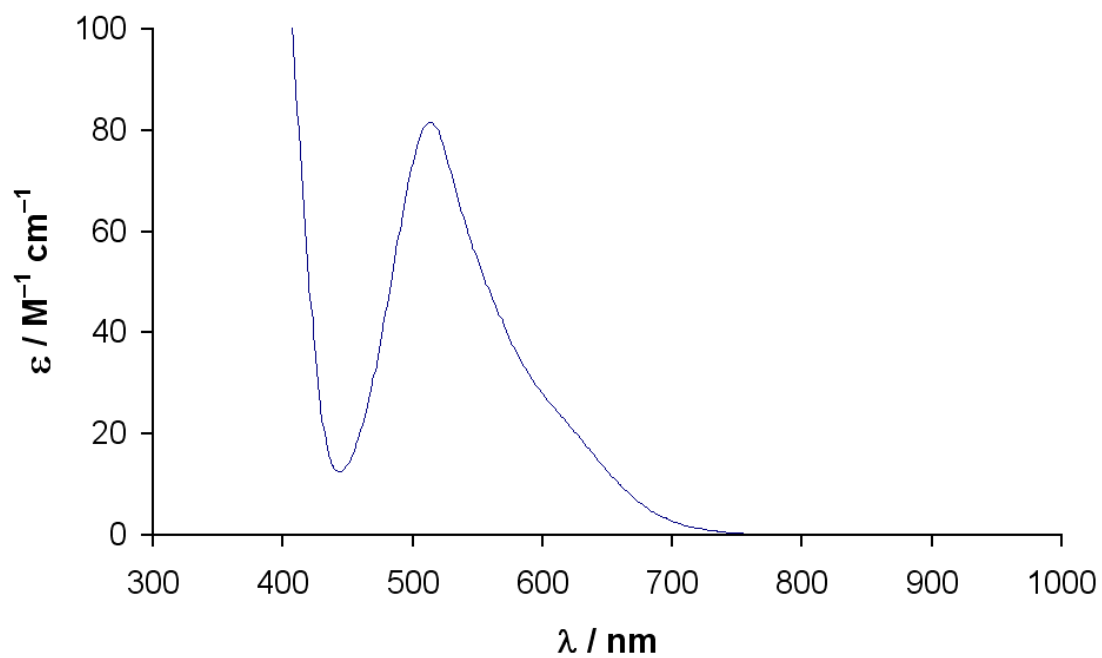

**Fig. S4** Electronic absorption spectrum of [VO(mpo)<sub>2</sub>] recorded in CH<sub>2</sub>Cl<sub>2</sub>.

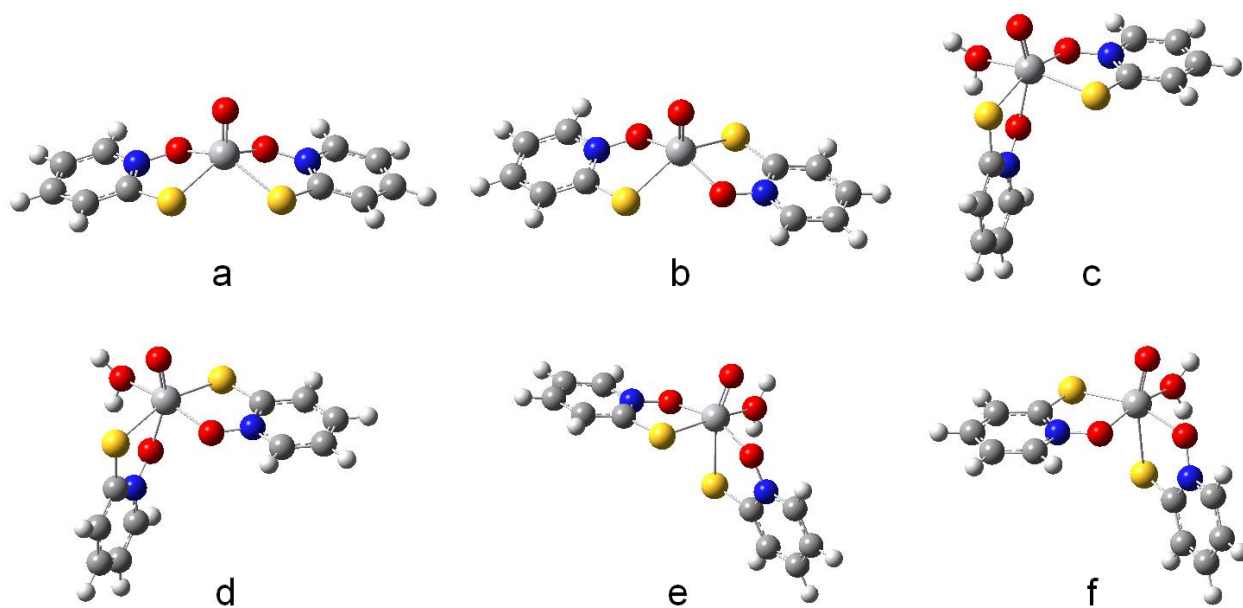

**Fig. S5** Optimised structure of the possible isomers of [VO(mpo)<sub>2</sub>] (a-b) and of *cis*-[VO(mpo)<sub>2</sub>(H<sub>2</sub>O)] (c-f).



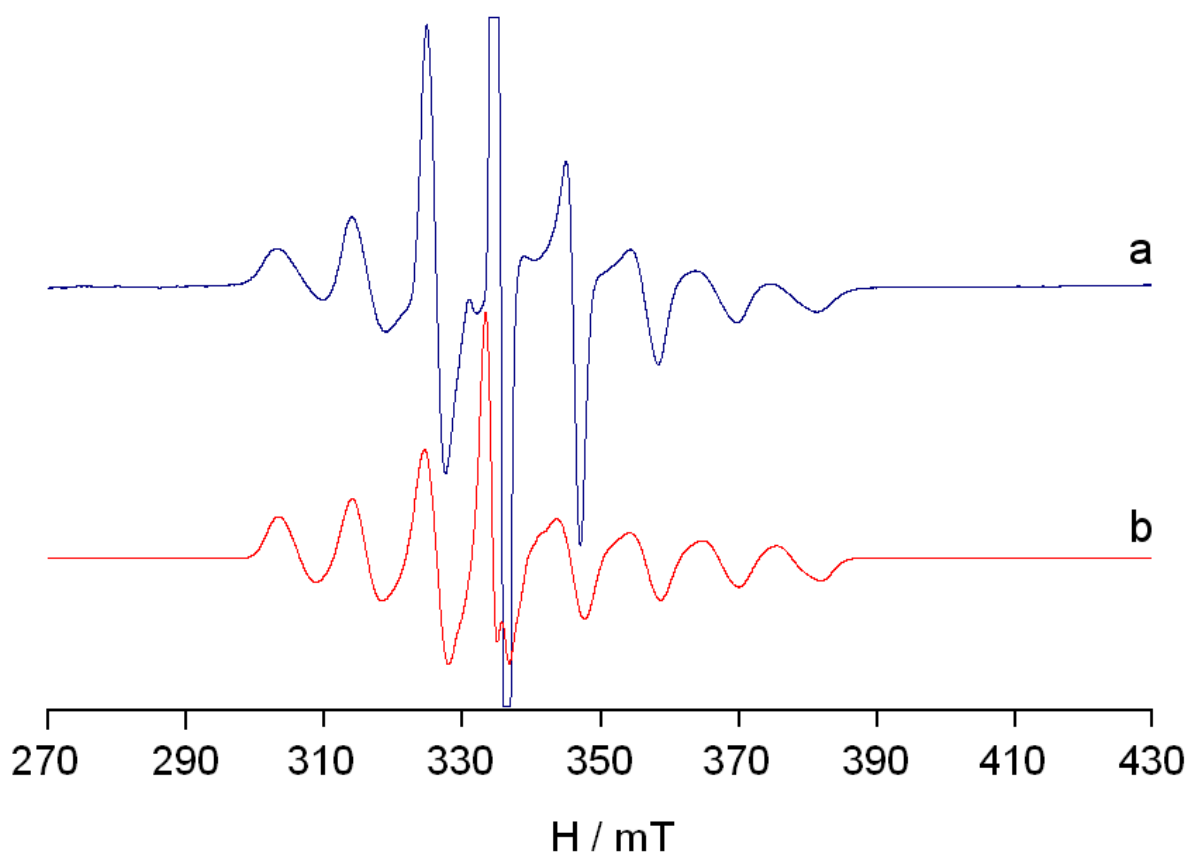

**Fig. S6** X-band anisotropic EPR spectrum of  $[V(\text{mpo})_3]^+$  recorded at 120 K: (a) experimental and (b) simulated. The spectrum was simulated with  $g_x = 1.961$ ,  $g_y = 1.963$ ,  $g_z = 1.999$ ,  $A_x = -104.0 \times 10^{-4} \text{ cm}^{-1}$ ,  $A_y = -93.0 \times 10^{-4} \text{ cm}^{-1}$ ,  $A_z = 2.6 \times 10^{-4} \text{ cm}^{-1}$ .

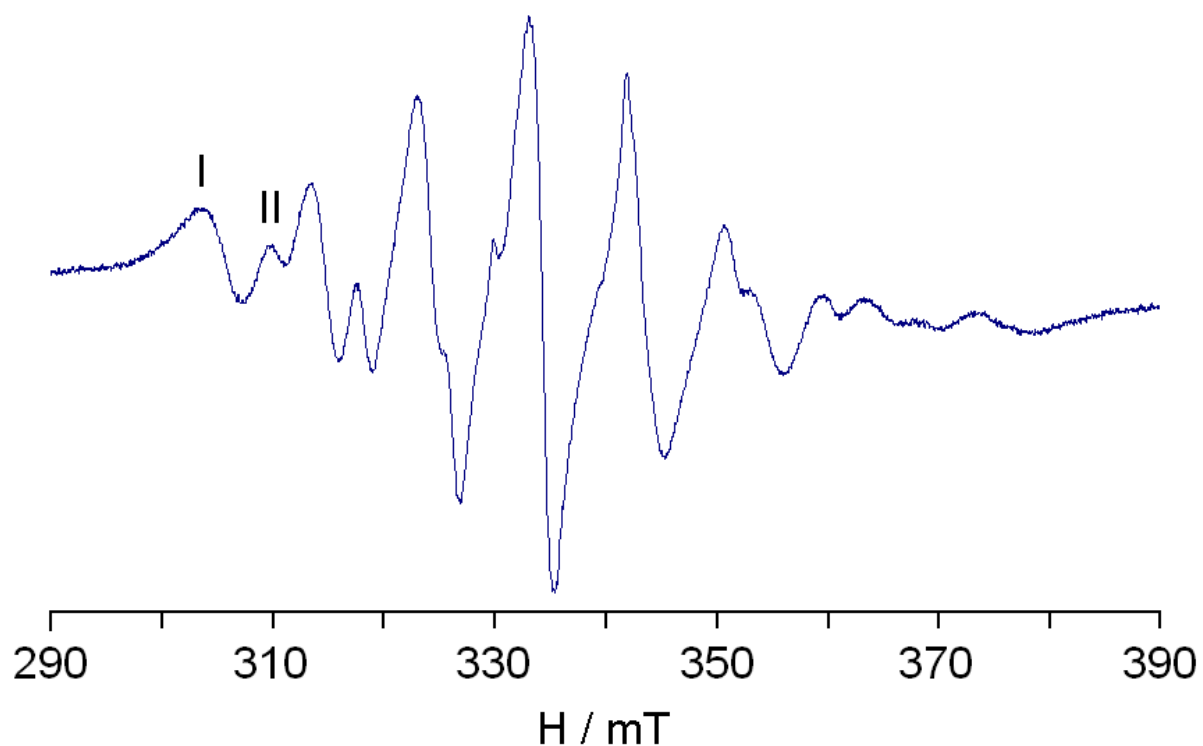

**Fig. S7** X-band isotropic EPR spectrum recorded at RT and pH 7.4 on a solution DMSO/H<sub>2</sub>O 50:50 v/v with ratio VO<sup>2+</sup>/Hhpo 1:2 and concentration of VO<sup>2+</sup> ion 1x10<sup>-3</sup> M. With **I** and **II** are indicated the resonances  $M_1 = -7/2$  of *cis*-[VO(hpo)<sub>2</sub>(H<sub>2</sub>O)] and [VO(hpo)<sub>2</sub>], respectively.

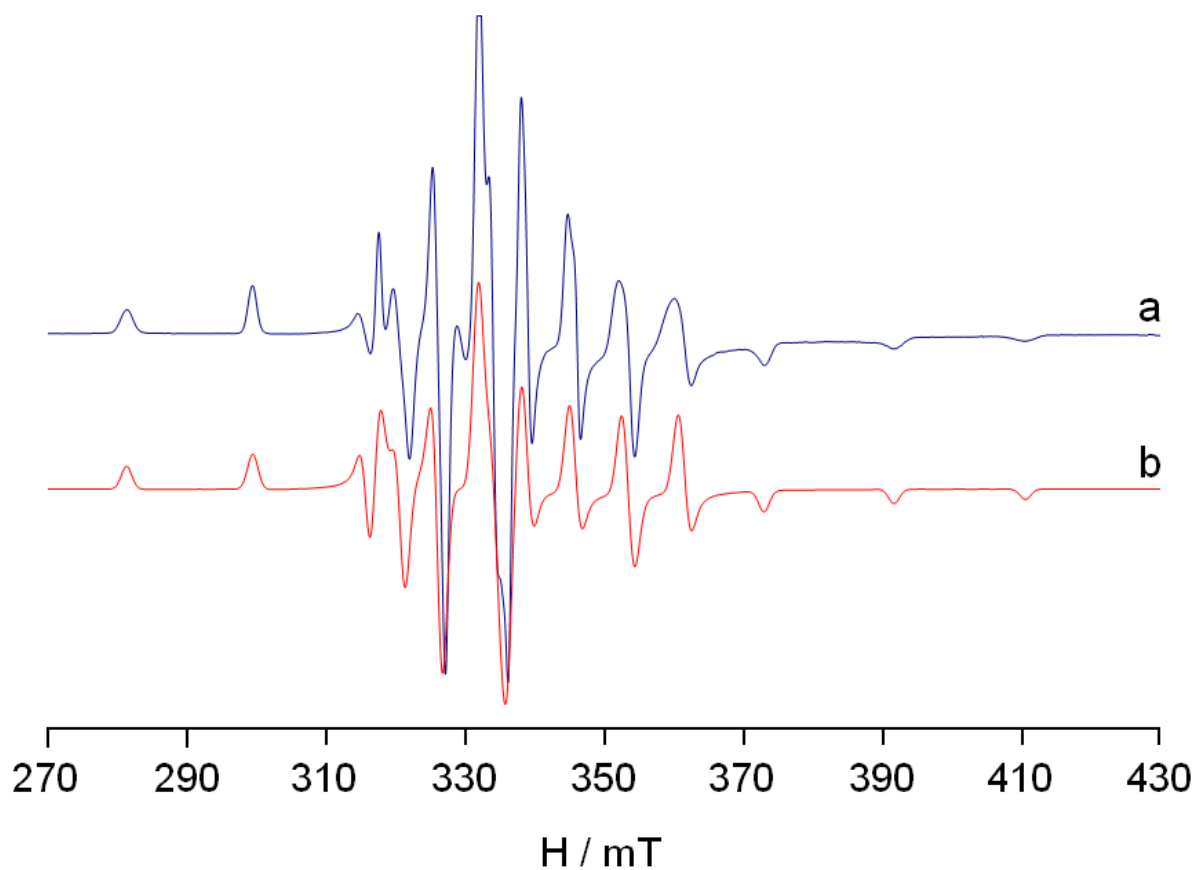

**Fig. S8** X-band anisotropic EPR spectrum recorded at 120 K and pH 7.4 on a solution DMSO/H<sub>2</sub>O 50:50 v/v with ratio VO<sup>2+</sup>/Hhpo = 1:2 and concentration of VO<sup>2+</sup> = 1x10<sup>-3</sup> M: (a) experimental and (b) simulated. The spectrum belongs to *cis*-[VO(hpo)<sub>2</sub>(H<sub>2</sub>O)] and was simulated with  $g_x = 1.980$ ,  $g_y = 1.976$ ,  $g_z = 1.940$ ,  $A_x = -59.0 \times 10^{-4} \text{ cm}^{-1}$ ,  $A_y = -60.0 \times 10^{-4} \text{ cm}^{-1}$ ,  $A_z = -168.2 \times 10^{-4} \text{ cm}^{-1}$ .

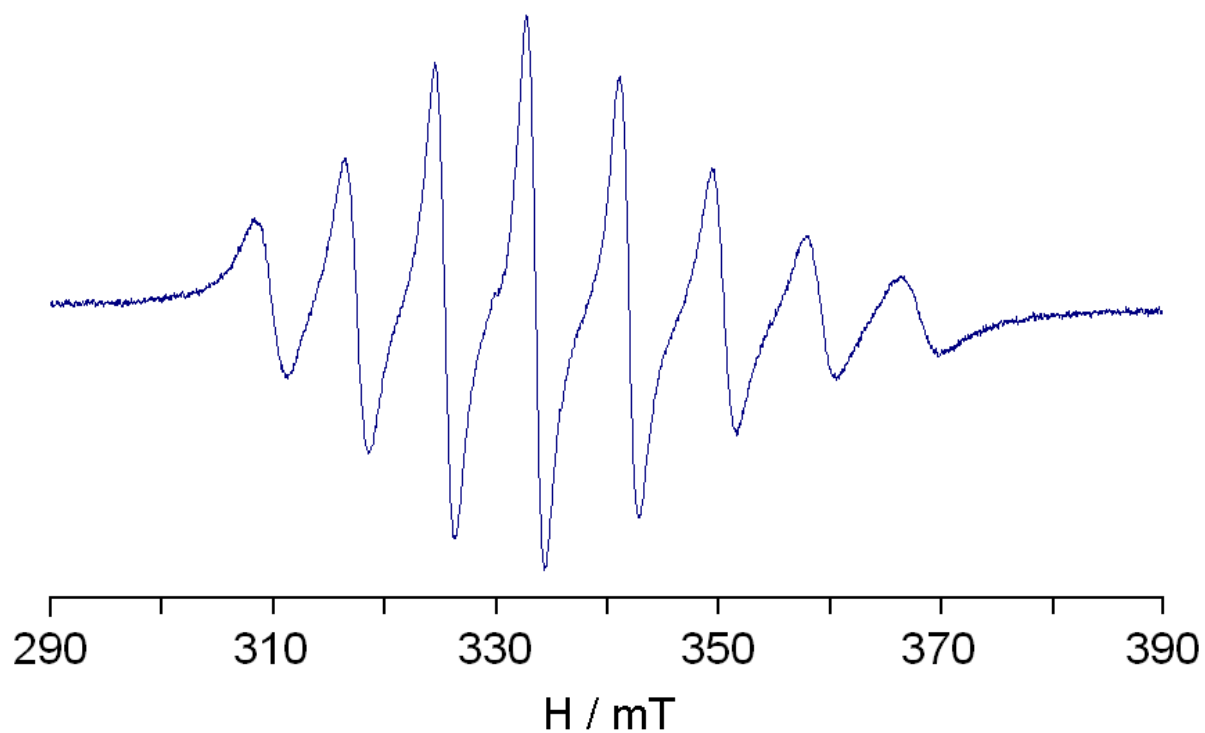

**Fig. S9** X-band isotropic EPR spectrum recorded at RT and pH 7.4 on a solution DMSO/H<sub>2</sub>O 50:50 v/v with ratio VO<sup>2+</sup>/Hmpo 1:2 and concentration of VO<sup>2+</sup> ion 1x10<sup>-3</sup> M. The spectrum belongs to [VO(mpo)<sub>2</sub>].

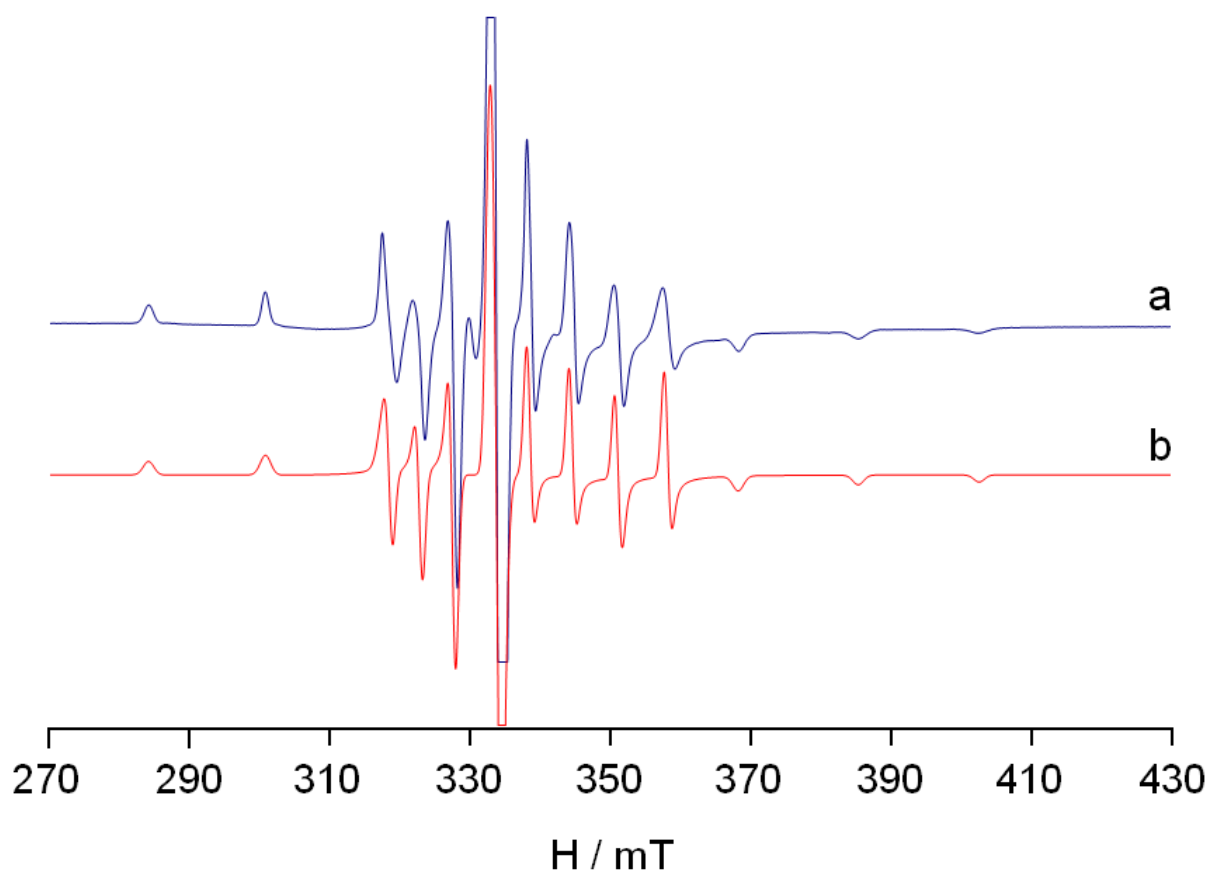

**Fig. S10** X-band anisotropic EPR spectrum recorded at 120 K and pH 7.4 on a solution DMSO/H<sub>2</sub>O 50:50 v/v with ratio VO<sup>2+</sup>/Hmpo 1:2 and concentration of VO<sup>2+</sup> 1×10<sup>-3</sup> M: (a) experimental and (b) simulated. The spectrum belongs to *cis*-[VO(mpo)<sub>2</sub>(H<sub>2</sub>O)] and was simulated with  $g_x = 1.980$ ,  $g_y = 1.980$ ,  $g_z = 1.955$ ,  $A_x = -52.0 \times 10^{-4} \text{ cm}^{-1}$ ,  $A_y = -52.0 \times 10^{-4} \text{ cm}^{-1}$ ,  $A_z = -154.3 \times 10^{-4} \text{ cm}^{-1}$ .

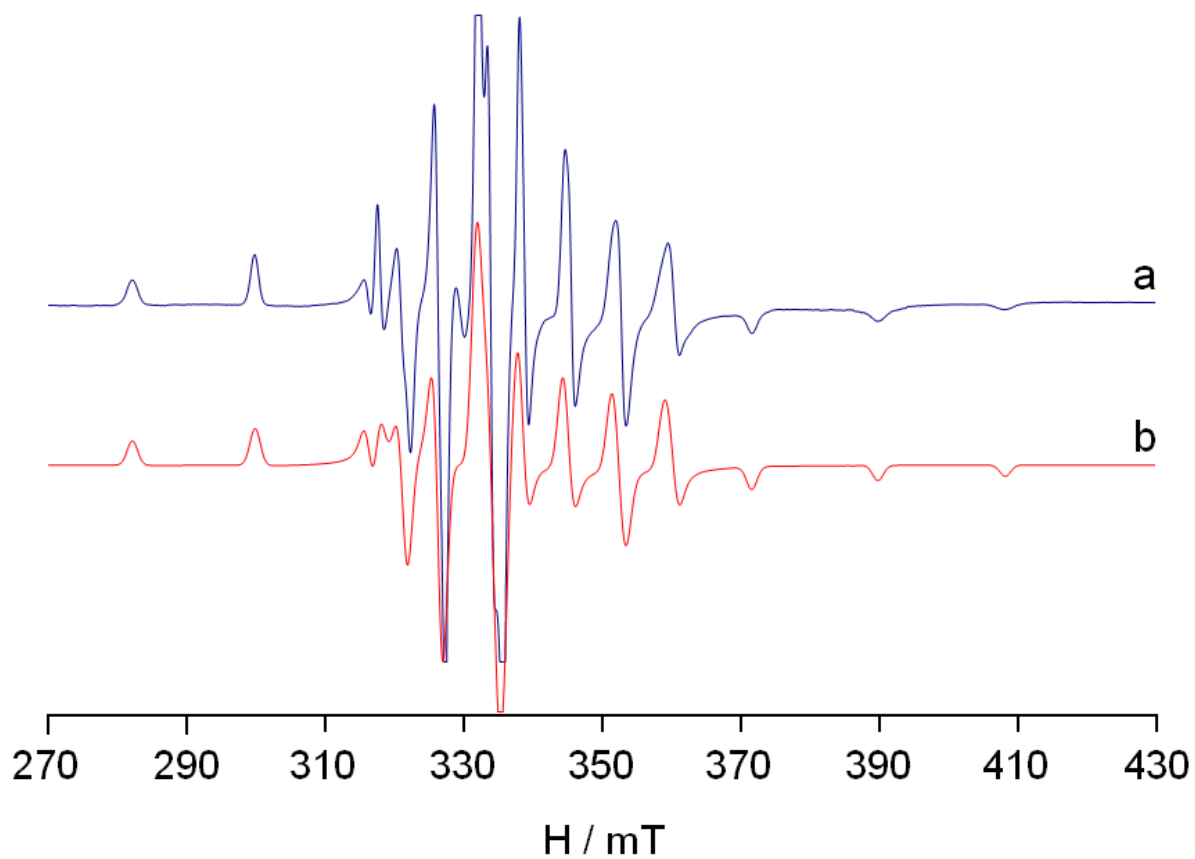

**Fig. S11** Anisotropic EPR spectrum recorded at 120 K and pH 7.4 on a solution DMSO/H<sub>2</sub>O 50:50 with ratio VO<sup>2+</sup>/Hhpo/1-MeIm 1:2:4 and concentration of VO<sup>2+</sup> 1×10<sup>-3</sup> M: (a) experimental and (b) simulated. The spectrum belongs to *cis*-[VO(hpo)<sub>2</sub>(1-MeIm)] and was simulated with  $g_x = 1.984$ ,  $g_y = 1.982$ ,  $g_z = 1.947$ ,  $A_x = -55.0 \times 10^{-4} \text{ cm}^{-1}$ ,  $A_y = -58.0 \times 10^{-4} \text{ cm}^{-1}$ ,  $A_z = -163.7 \times 10^{-4} \text{ cm}^{-1}$ .

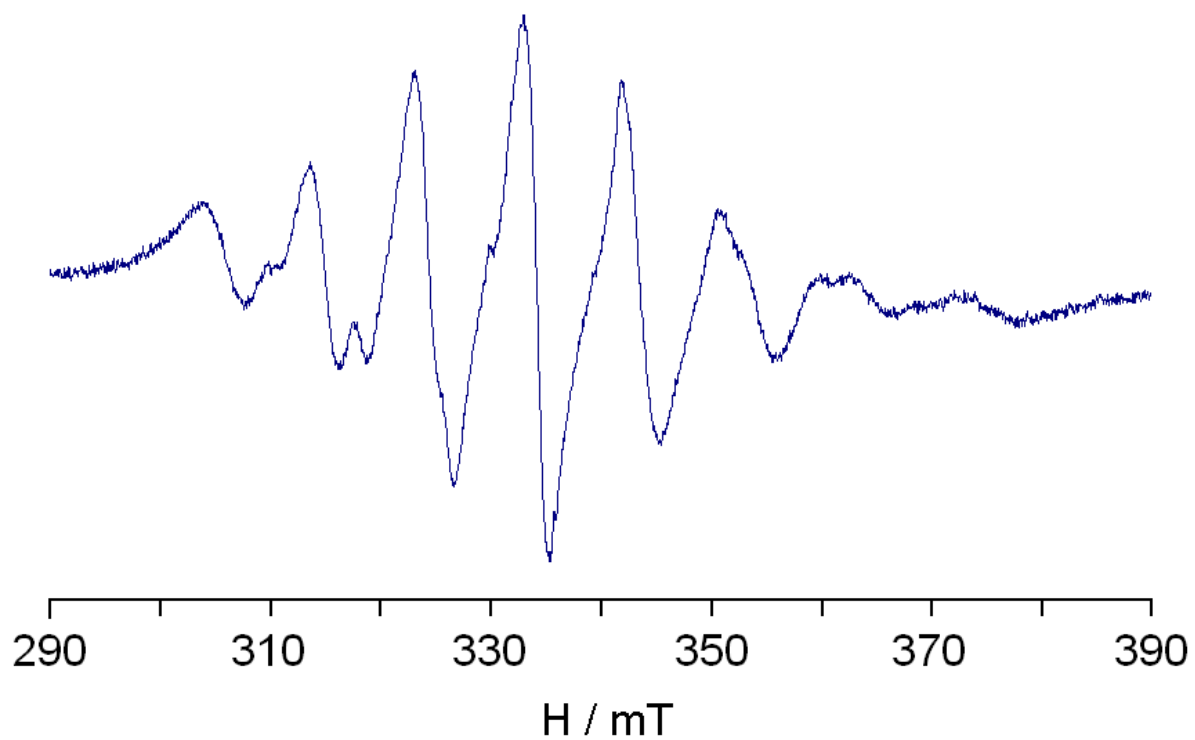

**Fig. S12** X-band isotropic EPR spectrum recorded at RT and pH 7.4 on a solution DMSO/H<sub>2</sub>O 50:50 v/v with ratio  $\text{VO}^{2+}$ /Hhpo/1-MeIm 1:2:4 and concentration of  $\text{VO}^{2+}$  ion  $1 \times 10^{-3}$  M.

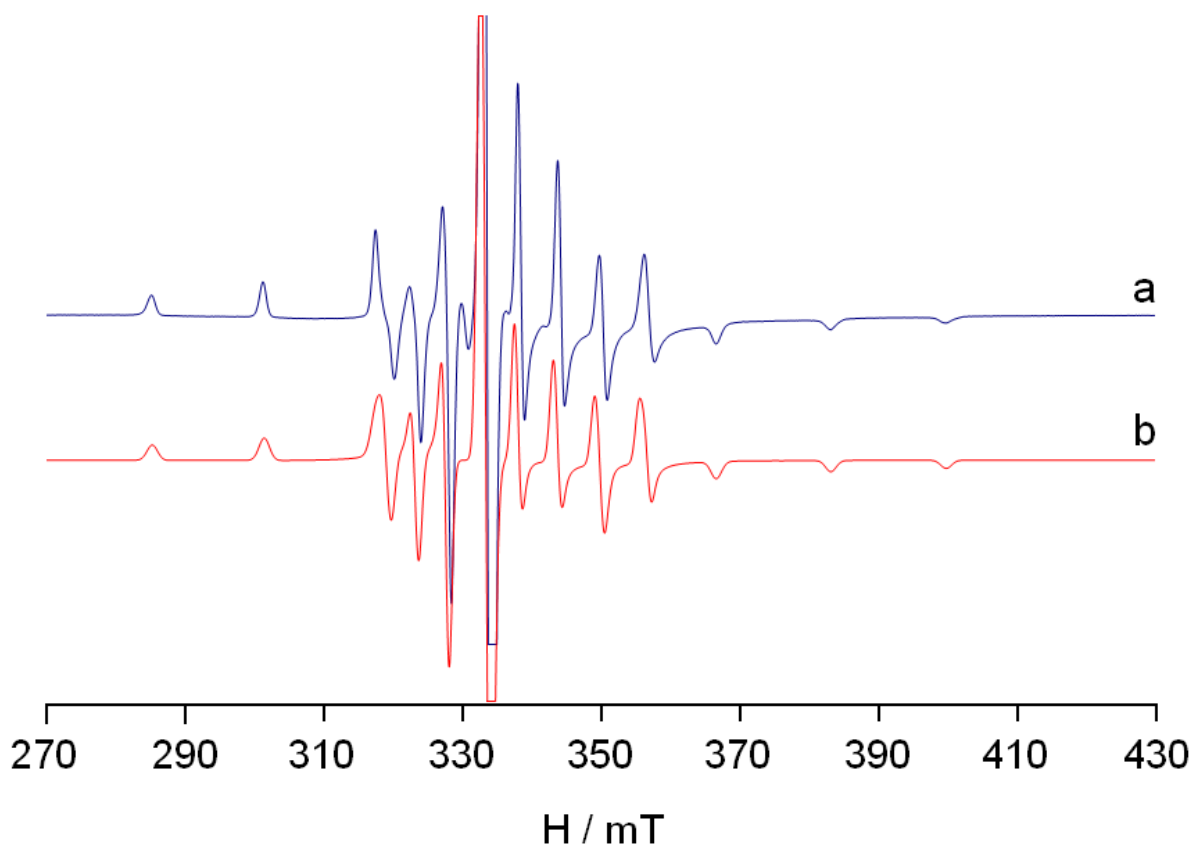

**Fig. S13** Anisotropic EPR spectrum recorded at 120 K and pH 7.4 on a solution DMSO/H<sub>2</sub>O 50:50 with ratio VO<sup>2+</sup>/Hmpo/1-MeIm 1:2:4 and concentration of VO<sup>2+</sup> 1×10<sup>-3</sup> M: (a) experimental and (b) simulated. The spectrum belongs to *cis*-[VO(mpo)<sub>2</sub>(1-MeIm)] and was simulated with  $g_x = 1.985$ ,  $g_y = 1.984$ ,  $g_z = 1.960$ ,  $A_x = -47.0 \times 10^{-4} \text{ cm}^{-1}$ ,  $A_y = -50.0 \times 10^{-4} \text{ cm}^{-1}$ ,  $A_z = -149.7 \times 10^{-4} \text{ cm}^{-1}$ .



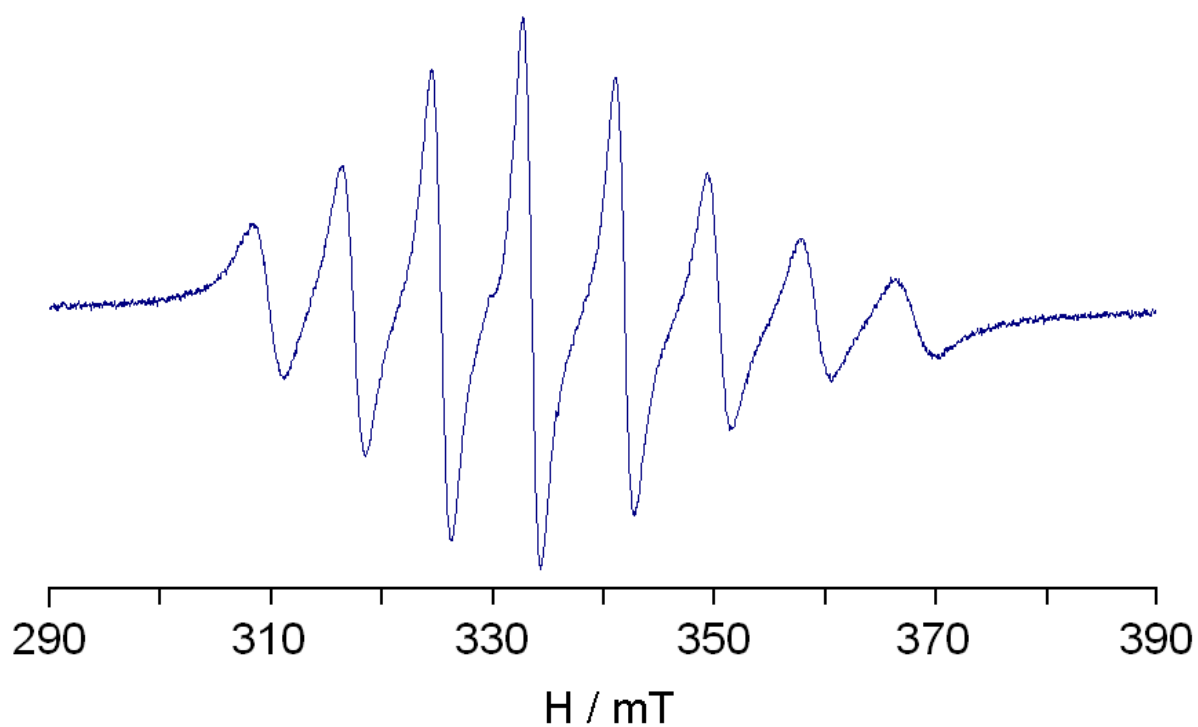

**Fig. S14** X-band isotropic EPR spectrum recorded at RT and pH 7.4 on a solution DMSO/H<sub>2</sub>O 50:50 v/v with ratio VO<sup>2+</sup>/Hmpo/1-MeIm 1:2:4 and concentration of VO<sup>2+</sup> ion 1x10<sup>-3</sup> M. The spectrum belongs to [VO(mpo)<sub>2</sub>].

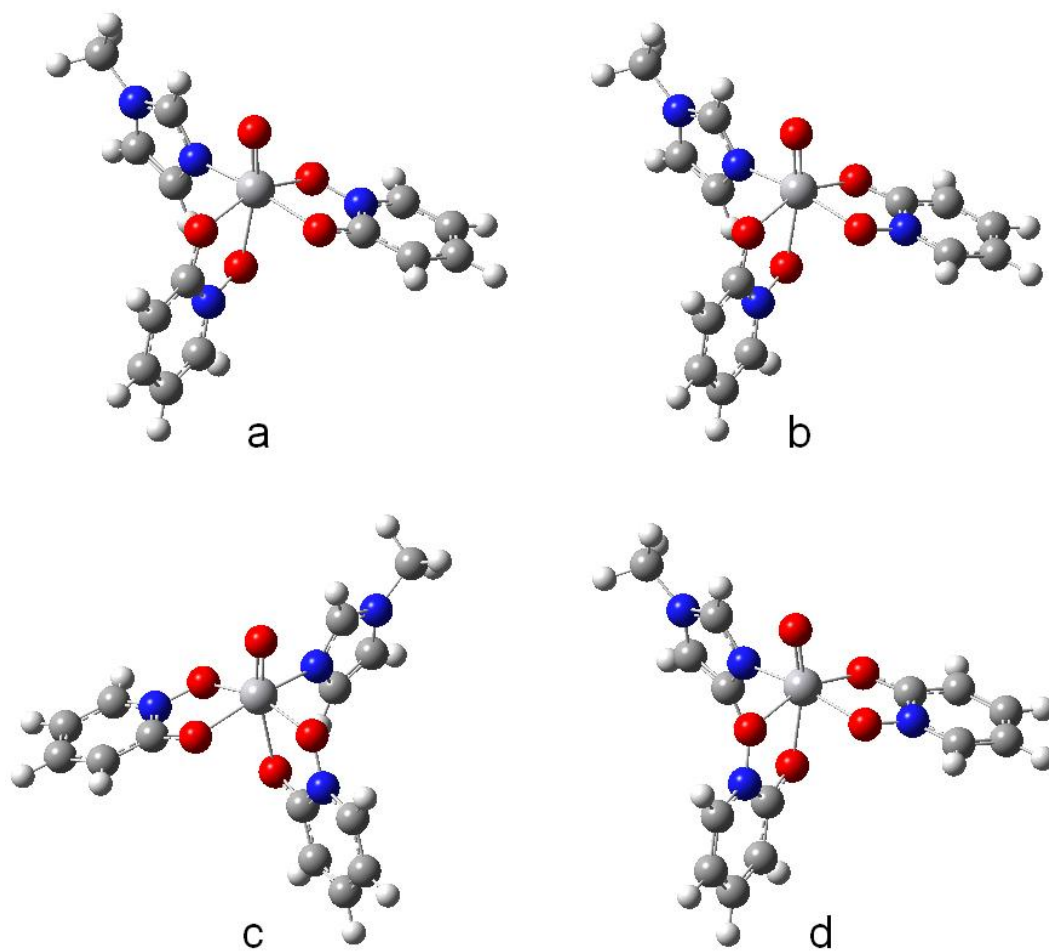

**Fig. S15** Optimised structure of the possible isomers of *cis*-[VO(hpo)<sub>2</sub>(1-MeIm)], calculated with DFT methods at the level of theory B3P86/6-311g.

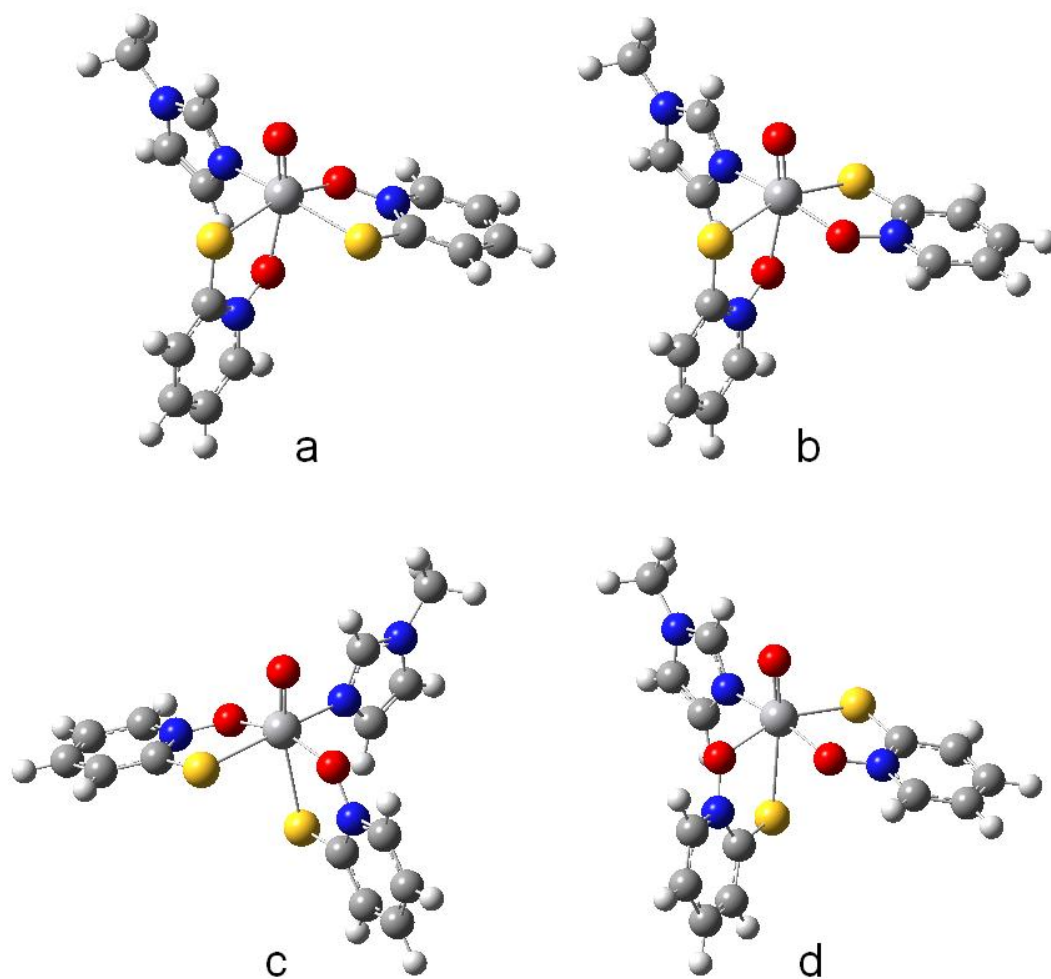

**Fig. S16** Optimised structure of the possible isomers of *cis*-[VO(mpo)<sub>2</sub>(1-MeIm)], calculated with DFT methods at the level of theory B3P86/gen (the basis set 6-311+g(d) for S and 6-311g for the other atoms was used).
